# Supplementary material for: MeCP2 Promotes Colorectal Cancer Metastasis by Modulating ZEB1 Transcription
Source: PubMed Central journal article supplement (PMC7140043; doi:10.3390/cancers12030758), 2020-03-23
Supplement: cancers-12-00758-s001.pdf [file cancers-12-00758-s001.pdf]

## Supplementary Tables

**Table S1.** Information about patients recruited from Peking Union Medical College Hospital.

| Patient ID | Age (years) | Gender | Location | TNM stage | AJCC stage |
|------------|-------------|--------|----------|-----------|------------|
| 1          | 66          | female | Colon    | T2N1a     | III        |
| 2          | 78          | male   | Rectum   | T2N1b     | III        |
| 3          | 72          | female | Colon    | T3N0      | II         |
| 4          | 67          | female | Colon    | T2N0      | I          |
| 5          | 61          | female | Rectum   | T3N2aM0   | III        |
| 6          | 76          | female | Rectum   | T1N0M0    | I          |
| 7          | 67          | female | Rectum   | T3N0M0    | II         |
| 8          | 60          | female | Rectum   | T2N2aM0   | III        |
| 9          | 74          | female | Rectum   | T2N1aM0   | III        |
| 10         | 82          | male   | Colon    | T3N1aM0   | III        |

**Table S2.** Information about patients of tissue microarray.

| Patient ID | Age (years) | Gender | Location | Metastatic locationg | Diameter of Tumor (cm) | TNM stage |
|------------|-------------|--------|----------|----------------------|------------------------|-----------|
| 1          | 53          | female | Colon    | Liver                | 5*4*2.5                | T4N2aM0   |
|            | 54          |        |          |                      | 2.5*2*2                | N1bM1     |
| 2          | NA          | female | Colon    | Liver                | 4*4*1.5                | T3N0M0    |
|            | NA          |        |          |                      | 5*3.5*3                | M1        |
| 3          | 61          | male   | Colon    | Liver                | 3.5*3*1                | T3N0M0    |
|            | 62          |        |          |                      | 3.5*3*2.7              | M1        |
| 4          | 66          | female | Colon    | Liver                | 3*3*1.5                | T3N1bM0   |
|            | 67          |        |          |                      | 3*2*2                  | N0M1      |
| 5          | 60          | male   | Colon    | Liver                | 9*7*1                  | NA        |
|            | 60          |        |          |                      | 7.5*6*4.8              | M1        |
| 6          | 73          | male   | Colon    | Liver                | 11*7*3                 | T3N1aM0   |
|            | 73          |        |          |                      | 5*4*4                  | M1        |
| 7          | 61          | male   | Colon    | Liver                | 4*3.5*1.5              | T3N0M0    |
|            | 62          |        |          |                      | 2*2*1.5                | M1        |
| 8          | 50          | male   | Colon    | Liver                | NA                     | NA        |
|            | 51          |        |          |                      | 5*5*3                  | M1        |
| 9          | 46          | male   | Rectum   | Liver                | 4*4*1                  | N1bM0     |
|            | 48          |        |          |                      | 11*7*5                 | M1        |
| 10         | 67          | male   | Rectum   | Liver                | 4*4*2                  | N2aM0     |
|            | 69          |        |          |                      | 4*3*2.5                | M1        |
| 11         | NA          | male   | Rectum   | Liver                | 4*4*1                  | NA        |
|            | NA          |        |          |                      | 4*3*3                  | M1        |
| 12         | 59          | male   | Rectum   | Liver                | 4*1.5*1                | T3N0      |
|            | 59          |        |          |                      | 6.5*4*3.5              | M1        |

|    |    |        |        |       |         |       |
|----|----|--------|--------|-------|---------|-------|
| 13 | 63 | male   | Rectum |       | 4*3*1   | N1aM0 |
|    | 63 |        |        | Liver | NA      | M1    |
| 14 | 53 | female | Rectum |       | 3*2*0.5 | N2aM0 |
|    | 54 |        |        | Liver |         | M1    |

NA: not available

**Table S3.** The primer sequence of CHIP-qPCR.

| <b>qPCR primers (human)</b> |                                 |
|-----------------------------|---------------------------------|
| <i>GAPDH</i> -F             | 5'- TACTAGCGGTTTTACGGGCG-3'     |
| <i>GAPDH</i> -R             | 5'- TCGAACAGGAGGAGCAGAGAGCGA-3' |
| pZEB1-1-F                   | AGGATGAACACTGAAGGAAGC           |
| pZEB1-1-R                   | ACCAGAAAGGAAAAAAAAAACT          |
| pZEB1-2-F                   | AACTCACACTTAACCAAGC             |
| pZEB1-2-R                   | GTCCATGAAATGTGACTGT             |
| pZEB1-3-F                   | GGTCACGTTTCAGTTTTCT             |
| pZEB1-3-R                   | CGAATAAGGAAACGTCTTT             |
| pZEB1-4-F                   | AAGGAGGTGGGAAGCAGGA             |
| pZEB1-4-R                   | CAGATGTGATCTCTGAACC             |
| pZEB1-5-F                   | AAGCACCGTGTGGGTATT              |
| pZEB1-5-R                   | CGGAGAGAGGCTACCTGA              |
| pZEB1-6-F                   | GTTCAATCTCATTGAAGTCACTCC        |
| pZEB1-6-R                   | AAGGGATCGCGGTCTGGACTC           |

F, forward; R, reverse.

**Table S4.** GSEA analysis of MeCP2 expression in TCGA.

| Name                                       | NES  | FDR q-val |
|--------------------------------------------|------|-----------|
| HALLMARK_HEDGEHOG_SIGNALING                | 1.93 | 0.045     |
| HALLMARK_EPITHELIAL_MESENCHYMAL_TRANSITION | 1.67 | 0.241     |
| HALLMARK_WNT_BETA_CATENIN_SIGNALING        | 1.65 | 0.185     |
| HALLMARK_MYOGENESIS                        | 1.65 | 0.140     |
| HALLMARK_UV_RESPONSE_DN                    | 1.58 | 0.181     |
| HALLMARK_APICAL_JUNCTION                   | 1.54 | 0.193     |

**Table S5** The sequence of wild type or depletion MeCP2 CDS.

| Vectors                  | Sequence                                                                                                                                                                                                                                                                                                                                                                                                                                                                                                                                                                                                                                                                                                                                                                                                                                                                                                                                                                                                                                                                                                                                   |
|--------------------------|--------------------------------------------------------------------------------------------------------------------------------------------------------------------------------------------------------------------------------------------------------------------------------------------------------------------------------------------------------------------------------------------------------------------------------------------------------------------------------------------------------------------------------------------------------------------------------------------------------------------------------------------------------------------------------------------------------------------------------------------------------------------------------------------------------------------------------------------------------------------------------------------------------------------------------------------------------------------------------------------------------------------------------------------------------------------------------------------------------------------------------------------|
| MeCP2 CDS<br>(wild type) | <p>ATGGTAGCTGGGATGTTAGGGCTCAGGGAAGAAAAGTCAGAAGACC<br/>           AGGACCTCCAGGGCCTCAAGGACAAACCCCTCAAGTTTAAAAAGGTG<br/>           AAGAAAGATAAGAAAGAAGAGAAAGAGGGCAAGCATGAGCCCGTG<br/>           CAGCCATCAGCCACCACTCTGCTGAGCCCGCAGAGGCAGGCAAAG<br/>           CAGAGACATCAGAAGGGTCAGGCTCCGCCCCGGCTGTGCCGGAAGCT<br/>           TCTGCCTCCCCAAACAGCGGGCTCCATCATCCGTGACCGGGGACC<br/>           CATGTATGATGACCCACCCCTGCCTGAAGGCTGGACACGGAAGCTTA<br/>           AGCAAAGGAAATCTGGCCGCTCTGCTGGGAAGTATGATGTGTATTTG<br/>           ATCAATCCCCAGGGAAAAGCCTTTCGCTC.....AGGAGAGCAGCCCCA<br/>           AGGGGCGCAGCAGCAGCGCCTCCTCACCCCCAAGAAGGAGCACCA<br/>           CCACCATCACCACCACTCAGAGTCCCCAAAGGCCCCCGTGCCACTGC<br/>           TCCCACCCCTGCCCCACCTCCACCTGAGCCCGAGAGCTCCGAGGAC<br/>           CCCACCAGCCCCCTGAGCCCCAGGACTTGAGCAGCAGCGTCTGCAA<br/>           AGAGGAGAAGATGCCAGAGGAGGCTCACTGGAGAGCGACGGCTGC<br/>           CCAAGGAGCCAGCTAAGACTCAGCCCGCGTTGCCACCGCCGCCAC<br/>           GGCCGCAGAAAAGTACAAACACCGAGGGGAGGGAGAGCGCAAAGA<br/>           CATTGTTTCATCCTCCATGCCAAGGCCAAACAGAGAGGAGCCTGTGG<br/>           ACAGCCGGACGCCCGTGACCGAGAGAGTTAGCTGA</p> |
| MeCP2<br>CDS (T1)        | <p>truncation <b>ATGGTAGCTGGGATGTTAGGGCTCAGGGAAGAAAAGTCAGAAGACC</b><br/> <b>AGGACCTCCAGGGCCTCAAGGACAAACCCCTCAAGTTTAAAAAGGTG</b><br/> <b>AAGAAAGATAAGAAAGAAGAGAAAGAGGGCAAGCATGAGCCCGTG</b><br/> <b>CAGCCATCAGCCACCACTCTGCTGAGCCCGCAGAGGCAGGCAAAG</b><br/> <b>CAGAGACATCAGAAGGGTCAGGCTCCGCCCCGGCTGTGCCGGAAGCT</b><br/> <b>TCTGCCTCCCCAAACAGCGGGCTCCATCATCCGTGACCGGGGACC</b><br/>           CATGTATGATGACCCACCCCTGCCTGAAGGCTGGACACGGAAGCTTA<br/>           AGCAAAGGAAATCTGGCCGCTCTGCTGGGAAGTATGATGTGTATTTG<br/>           ATCAATCCCCAGGGAAAAGCCTTTCGCTC.....AGGAGAGCAGCCCCA<br/>           AGGGGCGCAGCAGCAGCGCCTCCTCACCCCCAAGAAGGAGCACCA<br/>           CCACCATCACCACCACTCAGAGTCCCCAAAGGCCCCCGTGCCACTGC<br/>           TCCCACCCCTGCCCCACCTCCACCTGAGCCCGAGAGCTCCGAGGAC<br/>           CCCACCAGCCCCCTGAGCCCCAGGACTTGAGCAGCAGCGTCTGCAA<br/>           AGAGGAGAAGATGCCAGAGGAGGCTCACTGGAGAGCGACGGCTGC</p>                                                                                                                                                                                                                                          |

CCCAAGGAGCCAGCTAAGACTCAGCCCGCGGTTGCCACCGCCGCCAC  
GGCCGCAGAAAAGTACAAACACCGAGGGGAGGGAGAGCGCAAAGA  
CATTGTTTCATCCTCCATGCCAAGGCCAAACAGAGAGGAGCCTGTGG  
ACAGCCGGACGCCCGTGACCGAGAGAGTTAGCTGA

MeCP2 truncation CDS (T2) ATGGTAGCTGGGATGTTAGGGCTCAGGGAAGAAAAGTCAGAAGACC  
AGGACCTCCAGGGCCTCAAGGACAAACCCCTCAAGTTTAAAAAGGTG  
AAGAAAGATAAGAAAGAAGAGAAAGAGGGCAAGCATGAGCCCGTG  
CAGCCATCAGCCCACCACTCTGCTGAGCCCGCAGAGGCAGGCAAAG  
CAGAGACATCAGAAGGGTCAGGCTCCGCCCCGGCTGTGCCGGAAGCT  
TCTGCCTCCCCAAACAGCGGCGCTCCATCATCCGTGACCGGGGACC  
CATGTATGATGACCCACCCCTGCCTGAAGGCTGGACACGGAAGCTTA  
AGCAAAGGAAATCTGGCCGCTCTGCTGGGAAGTATGATGTGTATTTG  
ATCAATCCCAGGGAAAAGCCTTTCGCTC.....AGGAGAGCAGCCCCA  
AGGGGCGCAGCAGCAGCGCTCCTCACCCCCAAGAAGGAGCACC  
CCACCATCACCACCACTCAGAGTCCCCAAAGGCCCCCGTGCCACTGC  
TCCCACCCCTGCCCCACCTCCACCTGAGCCCGAGAGCTCCGAGGAC  
CCCACCAGCCCCCTGAGCCCCAGGACTTGAGCAGCAGCGTCTGCAA  
AGAGGAGAAGATGCCAGAGGAGGCTCACTGGAGAGCGACGGCTGC  
CCCAAGGAGCCAGCTAAGACTCAGCCCGCGGTTGCCACCGCCGCCAC  
GGCCGCAGAAAAGTACAAACACCGAGGGGAGGGAGAGCGCAAAGA  
CATTGTTTCATCCTCCATGCCAAGGCCAAACAGAGAGGAGCCTGTGG  
ACAGCCGGACGCCCGTGACCGAGAGAGTTAGCTGA

MeCP2 mutation CDS (R133C) ATGGTAGCTGGGATGTTAGGGCTCAGGGAAGAAAAGTCAGAAGACC  
AGGACCTCCAGGGCCTCAAGGACAAACCCCTCAAGTTTAAAAAGGTG  
AAGAAAGATAAGAAAGAAGAGAAAGAGGGCAAGCATGAGCCCGTG  
CAGCCATCAGCCCACCACTCTGCTGAGCCCGCAGAGGCAGGCAAAG  
CAGAGACATCAGAAGGGTCAGGCTCCGCCCCGGCTGTGCCGGAAGCT  
TCTGCCTCCCCAAACAGCGGCGCTCCATCATCCGTGACCGGGGACC  
CATGTATGATGACCCACCCCTGCCTGAAGGCTGGACACGGAAGCTTA  
AGCAAAGGAAATCTGGCCGCTCTGCTGGGAAGTATGATGTGTATTTG  
ATCAATCCCAGGGAAAAGCCTTUGCTC.....AGGAGAGCAGCCCCA  
AGGGGCGCAGCAGCAGCGCTCCTCACCCCCAAGAAGGAGCACCA  
CCACCATCACCACCACTCAGAGTCCCCAAAGGCCCCCGTGCCACTGC  
TCCCACCCCTGCCCCACCTCCACCTGAGCCCGAGAGCTCCGAGGAC  
CCCACCAGCCCCCTGAGCCCCAGGACTTGAGCAGCAGCGTCTGCAA  
AGAGGAGAAGATGCCAGAGGAGGCTCACTGGAGAGCGACGGCTGC  
CCCAAGGAGCCAGCTAAGACTCAGCCCGCGGTTGCCACCGCCGCCAC  
GGCCGCAGAAAAGTACAAACACCGAGGGGAGGGAGAGCGCAAAGA  
CATTGTTTCATCCTCCATGCCAAGGCCAAACAGAGAGGAGCCTGTGG  
ACAGCCGGACGCCCGTGACCGAGAGAGTTAGCTGA

MeCP2 isoform CDS (IB) ATGGCCGCGCCGCGCCGCGCCGCGCCGAGCGGAGGAGGAGGAG  
GCGAGGAGGAGAGACTGGAAGAAAAGTCAGAAGACCAGGACCTCC  
AGGGCCTCAAGGACAAACCCCTCAAGTTTAAAAAGGTGAAGAAAGA  
TAAGAAAGAAGAGAAAGAGGGCAAGCATGAGCCCGTGACGCCATCA

---

GCCCACCACTCTGCTGAGCCCGCAGAGGCAGGCAAAGCAGAGACAT  
CAGAAGGGTCAGGCTCCGCCCCGGCTGTGCCGGAAGCTTCTGCCTCC  
CCCAAACAGCGGCGTCCATCATCCGTGACCGGGGACCCATGTATGA  
TGACCCACCCCTGCCTGAAGGCTGGACACGGAAGCTTAAGCAAAGG  
AAATCTGGCCGCTCTGCTGGGAAGTATGATGTGTATTTGATCAATCCC  
CAGGGAAAAGCCTTTTCGCTC.....AGGAGAGCAGCCCCAAGGGGCGC  
AGCAGCAGCGCCTCCTCACCCCCAAGAAGGAGCACCACCACCATC  
ACCACCACTCAGAGTCCCCAAAGGCCCCCGTGCCACTGCTCCCACCC  
CTGCCCCACCTCCACCTGAGCCCGAGAGCTCCGAGGACCCACCCAG  
CCCCCTGAGCCCCAGGACTTGAGCAGCAGCGTCTGCAAAGAGGAG  
AAGATGCCCAGAGGAGGCTCACTGGAGAGCGACGGCTGCCCAAGG  
AGCCAGCTAAGACTCAGCCCGCGGTTGCCACCGCCGCCACGGCCGCA  
GAAAAGTACAAACACCGAGGGGAGGGAGAGCGCAAAGACATTGTTT  
CATCCTCCATGCCAAGGCCAAACAGAGAGGAGCCTGTGGACAGCCG  
GACGCCCGTGACCGAGAGAGTTAGCTGA

---

The right parts represent the mutation, the right with Strikethrough represent deletion sequence.

## **Materials and methods**

### *Cell culture*

The CRC cell lines HCT116, SW480, and HT29 were purchased from the National Infrastructure of Cell Line Resource (China, Beijing). HCT116 cells were cultured in IMDM supplemented with 10% FBS. SW480 cells were cultured in DMEM supplemented with 10% FBS. HT29 cells were cultured in DMEM/F12 supplemented with 10% FBS. All cells were cultured at 37°C under 5% CO<sub>2</sub> in a high-humidity atmosphere.

### *Immunoblotting*

Cells were lysed in RIPA buffer containing 1X protease inhibitor cocktail. Protein concentration was quantified using the BCA protein concentration assay kit (Pierce). Cell lysates were electrophoresed on SDS-polyacrylamide gels and transferred to a PVDF membrane (Millipore). Membranes were incubated with primary antibodies in TBST overnight at 4°C. The membranes were then incubated with HRP-conjugated secondary antibodies for 1 h at room temperature, and visualized using an ECL kit (Millipore). The antibodies used for immunoblotting were as follows:

MECP2 (#3456, CST), MECP2 (sc-137070, Santa cruz), ZEB1 (#3396), N-Cadherin (#13116), Vimentin (#5741), Slug (#9585), KLF4 (#4038), Sox2 (#3579)(CST), CD133 (ab19898), MMP14 (ab51074), GAPDH (ab8245)(Abcam).

### *Immunohistochemistry (IHC) analysis*

Fresh 4-μm sections were cut from paraffin-embedded tissue samples. After the sections were baked (65°C, 30 min), they were deparaffinized in xylene, then rehydrated in graded ethanol solutions. The sections were boiled with citrate buffer for 5 min for antigenic retrieval. The sections were incubated with a primary antibody overnight at 4°C. As a negative control, PBS was used to verify the antibody specificity. After washing, anti-rabbit or anti-mouse secondary antibodies (Zhongshan Biotech, Beijing, China) were used. The sections were incubated with DAB (3,3-diaminobenzidine), counterstained, dehydrated, and mounted in permanent mounting medium. IHC stained sections were reviewed and

scored independently by two superior pathologists. A final score was calculated by multiplying the proportion of positively stained tumor cells (0–100%) with the staining intensity (0,1,2,3).

### ***RNA extraction and qRT-PCR***

Total RNA from the cell lines was extracted using TRIzol Reagent (Invitrogen, USA) according to the manufacturer's instructions. cDNA was synthesized via reverse transcription (RT) according to the manufacturer's protocol (Takara, Dalian, China). PCR amplification was performed in triplicate using the SYBR Green PCR kit (Takara, Dalian, China). GAPDH was used as a control. The following primers were used:

|                  |                                              |                                        |
|------------------|----------------------------------------------|----------------------------------------|
| GAPDH            | (forward: 5'-GTCTCCTCTGACTTCAACAGCG-3';      | reverse: 5'-ACCACCCTGTTGCTGTAGCCAA-3') |
| MECP2            | (forward: 5'-TGAAGGCTGGACACGGAAGCTT-3';      | reverse: 5'-CAGGGATGTGTGCCTACCTTT-3')  |
| ZEB1             | (forward: 5'-GGCATAACCTACTCAACTACGG-3';      | reverse: 5'-TGGGCGGTGTAGAATCAGAGTC-3') |
| Vimentin         | (forward: 5'-AGGCAAAGCAGGAGTCCACTGA-3';      | reverse: 5'-ATCTGGCGTTCCAGGGACTCAT-3') |
| ZEB2             | (forward: 5'-AATGCACAGAGTGTGGCAAGGC-3';      | reverse: 5'-CTGCTGATGTGCGAACTGTAGG-3') |
| $\beta$ -catenin | (forward: 5'-CACAAGCAGAGTGTGAAGGTG-3';       | reverse: 5'-GATTCTGAGAGTCCAAAGACAG-3') |
| TCF3             | (forward: 5'-CCAGACCAAAGTCTCATCCTG-3';       | reverse: 5'-TCGCCGTTTCAAACAGGCTGCT-3') |
| TCF4             | (forward: 5'-GCCTCTTCACAGTAGTGCCATG-3';      | reverse: 5'-GCTGGTTTGGAGGAAGGATAGC-3') |
| Twist1           | (forward: 5'-GCCAGGTACATCGACTTCCTCT-3';      | reverse: 5'-TCCATCCTCCAGACCGAGAAGG-3') |
| ZO-1             | (forward: 5'-3': GTCCAGAATCTCGGAAAAGTGCC-3'; | reverse: 5'-CTTTCAGCGCACCATACCAACC-3') |

### ***Co-immunoprecipitation (IP)***

Cell lysates were incubated with specific antibodies overnight at 4°C, followed by precipitation with Protein A/G agarose beads (Santa Cruz, sc-2003) at 4°C for 1 h. Cell lysates from MECP2 stably-expressing HCT116 cells were subjected to co-IP with 5  $\mu$ g SPI1 antibody (#2258, CST), followed by Western blot with MECP2 (3456, CST) and SPI1 (sc-365208, Santa Cruz).

### ***Cell migration and invasion assays***

A total of  $1 \times 10^5$  cells/well were loaded into an insert with serum-free medium and allowed to adhere to a polycarbonate filter that was either pre-coated with 50  $\mu$ l of Matrigel for the invasion assay or uncoated for the migration assay. The lower chambers were filled with DMEM or IMDM and 10% FBS. Cells on the upper surface of the filters were wiped out after 48 h. Cells that had migrated and invaded through the Matrigel were then fixed and stained with crystal violet. The membranes containing migrated and invaded cells were counted in five randomly selected microscopic views.

### ***Wound healing assay***

CRC cells were seeded into 6-well plates at a density of  $1 \times 10^5$  cells/well in medium containing 10% FBS and cultured until ~80–90% confluence. The cells were scraped with a 10  $\mu$ l pipette tip to generate

scratch wounds. The cells were washed twice with serum-free DMEM to remove cell debris. To record scratch wound closure, images were captured at 0, 48, and 96 h time points in the same position.

### *In vivo metastasis assays*

HCT116 cells were washed with 1X PBS. For the intravenous injection, a total of  $1 \times 10^6$  cells in 0.1 mL of DMEM were injected into the tail vein of 6-week-old male nude mice. To assess the degree of tumor formation in the lung, imaging of living mice was performed on an Inveon small-animal SPECT/CT imaging system equipped with an isoflurane 2% anesthesia system at six weeks post-injection. After eight weeks, animals were sacrificed and the lungs were harvested. Collected lung tissues were fixed in 10% buffered formalin solution overnight. Fixed tissues were stained with hematoxylin and eosin (H&E).

### *Cell sphere formation*

A total of 500 cells were plated into 6-well ultralow attachment plates (3471, Corning) with serum-free medium containing 50 ng/mL epidermal growth factor (EGF; 236-EG-200, R&D), 20 ng/mL of basic fibroblast growth factor (bFGF; 233-FB-025, R&D), 1% N2 (17502048, Gibco), and 2% B27 (12587-010, Gibco). After 10 days, the number of spheres in each well with a diameter greater than 100  $\mu\text{m}$  was counted under the microscope.

### *DNA extraction and bisulfite pyrosequencing analysis*

Genomic DNA from fresh-frozen tissues and cells was isolated using MiniBEST Universal Genomic DNA Extraction Kit Ver.5.0 (TaKaRa), according to the manufacturer's instructions. An EpiTect Bisulfite Kit (QIAGEN, 59104) was applied to conduct the bisulfite modification of DNA (1–2  $\mu\text{g}$ ). PyroMark Assay Design Software 2.0 (Qiagen) was used to design the bisulfite pyrosequencing primers. The PyroMark Q96 System and software (Qiagen) were utilized for the sequencing reaction and methylation level quantification.

### *CCK8 assay*

Cell proliferation was evaluated using the CCK8 assay (MCE, NJ, USA) according to the manufacturer's instructions. The colon cancer cells were transfected with PLKO or shMeCP2, or transfected with Lenti-V2 or sgMeCP2, and plated into 96-well plates (2,000 cells per well) containing 100  $\mu\text{L}$  media. Then, colon cancer cells were cultured for 0 h, 24 h, 48 h and 72 h and incubated with CCK-8 reagent at a final concentration of 10  $\mu\text{L}/\text{mL}$  for 2 h at 37°C. The plate was mixed gently on an orbital shaker for 5 min before the absorbance was measured at 450 nm with a Multiskan FC microplate reader (ThermoFisher, USA). Each experiment was repeated three times.

### *Cell apoptosis*

Cell apoptosis was assessed using FITC Annexin V Apoptosis Detection Kit with PI (BioLegend, CA, USA) according to the manufacturer's instructions. After labelling, the cells were quantified on a BD Accuri™ C6 Flow Cytometer (BD Biosciences). The FlowJo software (Tree Star, Inc.) was used for the post-acquisition analysis of dot plots and histograms. A total of 50,000 events were acquired from each sample.

## Cell cycle

Cells were collected 48 h after transfection, and fixed in 75% ethanol at 4°C overnight. The cells were then resuspended in 500  $\mu$ L PBS and mixed with 50  $\mu$ g/mL propidium iodide (PI, BioLegend, USA). After incubation for 30 min at 37°C in the dark, the stages of the cell cycle were analyzed using a flow cytometer.

## Supplement figures

### Fig. S1

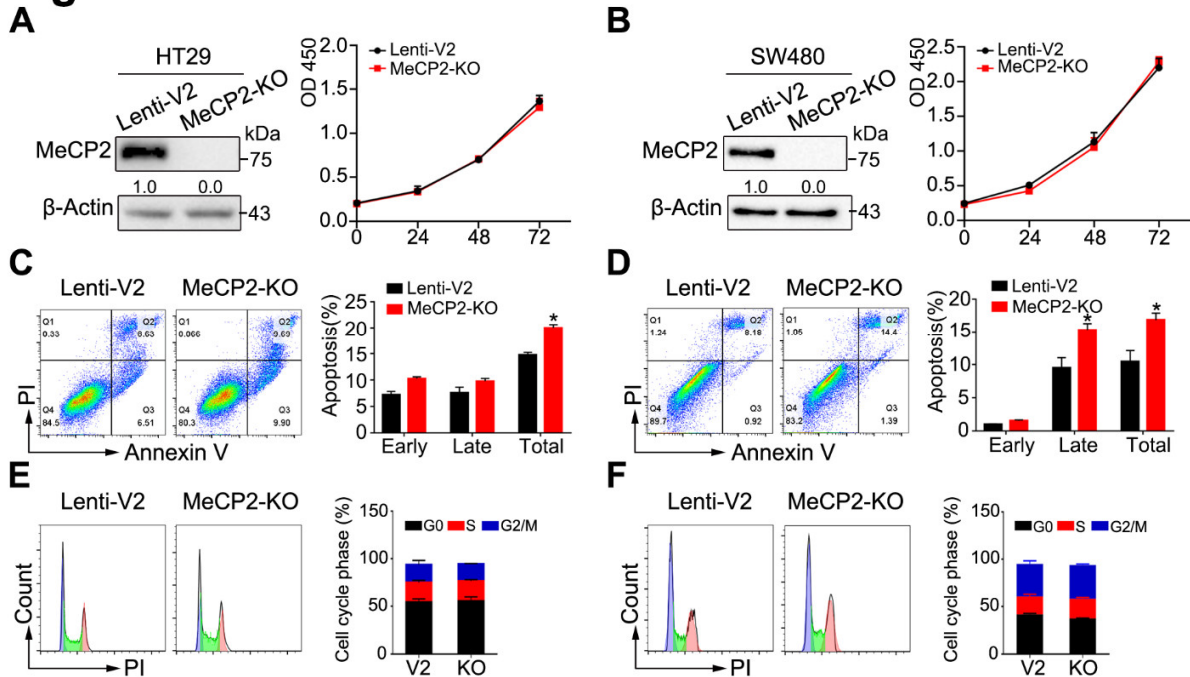

**Figure S1** A sgRNA-mediated MeCP2 knockout determined by Western blot (left). MeCP2 abrogation did not influence cell viability in HT29 cells (right). B sgRNA-mediated MeCP2 knockout determined by Western blot (left). MeCP2 abrogation did not influence cell viability in SW480 cells (right). C MeCP2 knockdown did not affect apoptosis of HT29 cells. D MeCP2 knockout did not influence apoptosis in SW480 cells. E MeCP2 knockout in HT29 cells did not influence the cell cycle distribution. F MeCP2 knockout in SW480 cells did not affect cell cycle distribution



# Fig. S2

A

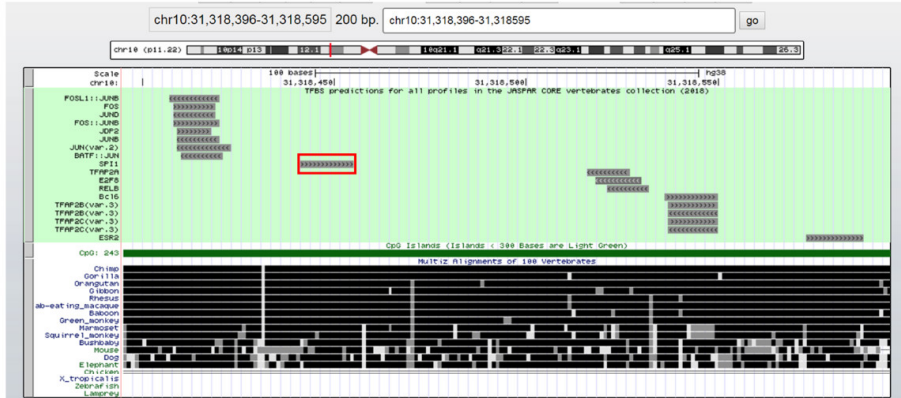

B

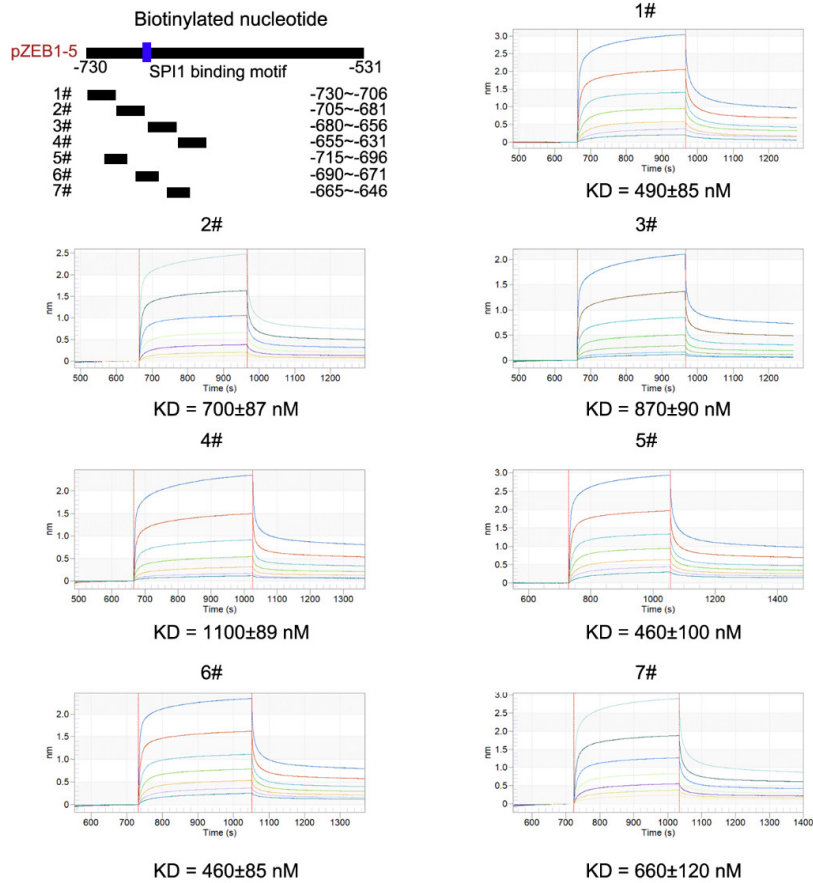

**Figure S2** A Prediction of transcription factor binding to the pZEB1-5 promoter region using the UCSC genome browser. B Bio-Layer Interferometry (BLI) analysis of the binding of seven biotin-nucleotides to the minimal binding domain (MBD) of the MeCP2 protein

# Fig. S3

**A**

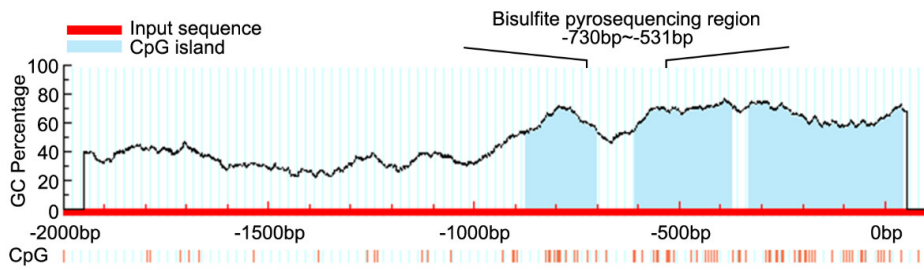

**B**

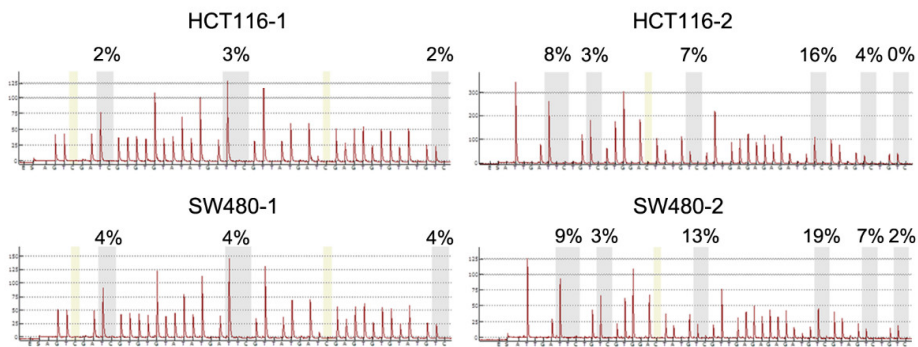

**C**

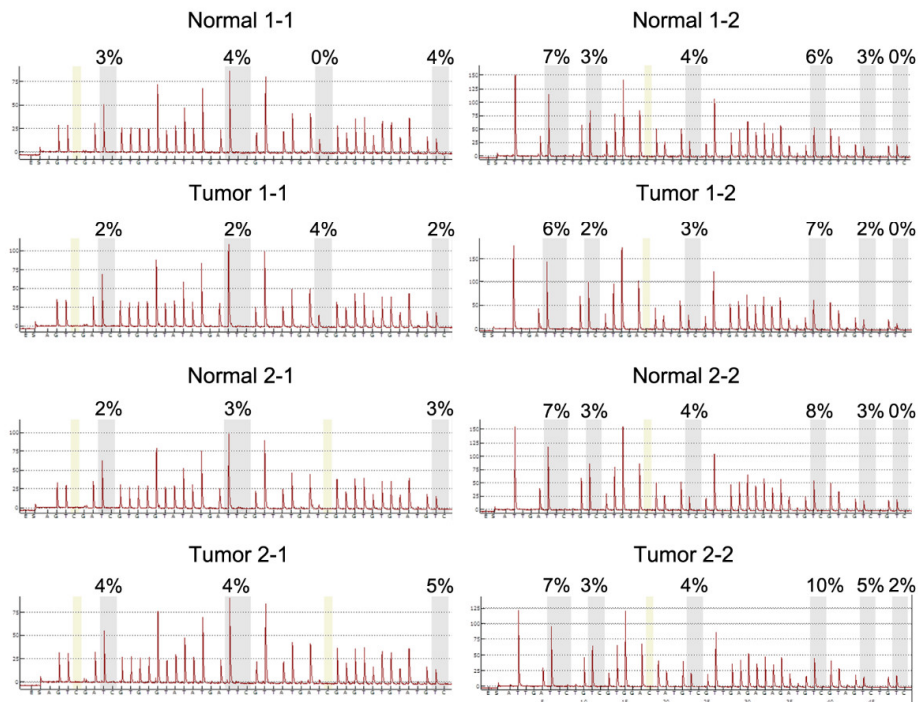

**Figure S3** A Schematic of the CpG islands and bisulfite pyrosequencing region in the ZEB1 promoter. Input sequence: red region; CpG islands: blue region. B Bisulfite pyrosequencing analysis of the ZEB1

promoter region in HCT116 and SW480 cells. C Bisulfite pyrosequencing analysis of the ZEB1 promoter region in normal (n = 2) and CRC (n = 2) tissues

## Fig. S4

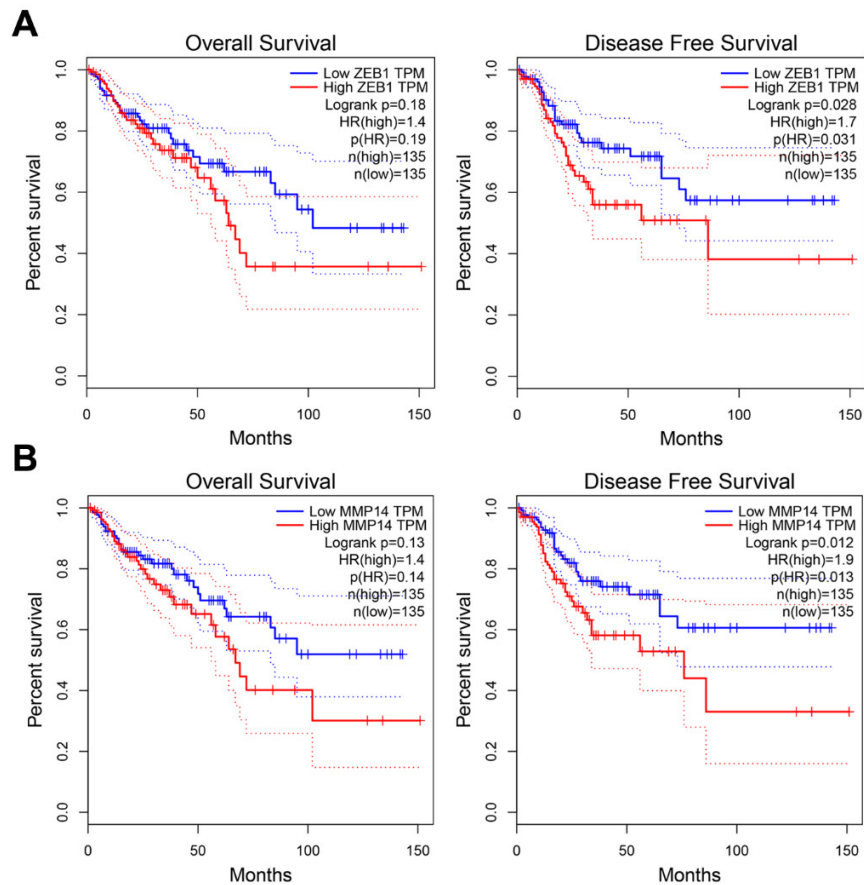

**Figure S4** A Correlation between ZEB1 expression and survival in TCGA database for CRC, Kaplan–Meier analysis of overall survival time (left) and disease free survival time (right). B Correlation between MMP14 expression and survival in TCGA database for CRC, Kaplan–Meier analysis of overall survival time (left) and disease free survival time (right).
